# Supplementary material for: Curricular course for medical students at a hematology and oncology specialty practice, 2010-2022
Source: PubMed Central journal article supplement (PMC9585415; doi:10.3205/zma001561), 2022-09-15
Supplement: JME-39-40-s-001.pdf [file JME-39-40-s-001.pdf]

Subject area: Medicine

Attachment 1: Questionnaire for course evaluation

### Course Evaluation

Age: \_\_\_\_\_ years      Sex:  female     male

Semester level: \_\_\_\_\_

I was absent from the course (please mark the right answer):

- 0 times     1-2 times     3-4 times     5-6 times     7-8 times  
 more than 8 times

My reason for attending the course (multiple responses possible):

- Required course, academic credit, relevant for exams  
 Instructor  
 Interest, topic  
 and/or \_\_\_\_\_

Please evaluate the course you attended using this survey. Please answer the questions independently and as accurately as possible. You can respond on the scale between "disagree completely" (1) and "agree completely" (6).

#### Course objectives and content:

|    |                                                                               | Disagree completely   |                       |                       |                       |                       | Agree completely      |
|----|-------------------------------------------------------------------------------|-----------------------|-----------------------|-----------------------|-----------------------|-----------------------|-----------------------|
| 01 | The educational objectives are clear and understandable.                      | <input type="radio"/> | <input type="radio"/> | <input type="radio"/> | <input type="radio"/> | <input type="radio"/> | <input type="radio"/> |
| 02 | The organization of course content is appropriate in terms of the objectives. | <input type="radio"/> | <input type="radio"/> | <input type="radio"/> | <input type="radio"/> | <input type="radio"/> | <input type="radio"/> |
| 03 | The amount of course material is too high.                                    | <input type="radio"/> | <input type="radio"/> | <input type="radio"/> | <input type="radio"/> | <input type="radio"/> | <input type="radio"/> |
| 04 | The importance and relevance of the topics can be recognized.                 | <input type="radio"/> | <input type="radio"/> | <input type="radio"/> | <input type="radio"/> | <input type="radio"/> | <input type="radio"/> |
| 05 | Connections between theory and practice are demonstrated.                     | <input type="radio"/> | <input type="radio"/> | <input type="radio"/> | <input type="radio"/> | <input type="radio"/> | <input type="radio"/> |
| 06 | The educational objectives are met.                                           | <input type="radio"/> | <input type="radio"/> | <input type="radio"/> | <input type="radio"/> | <input type="radio"/> | <input type="radio"/> |

**Evaluation of the instructor:**

|    |                                                                                  | Disagree completely   |                       |                       |                       |                       | Agree completely      |
|----|----------------------------------------------------------------------------------|-----------------------|-----------------------|-----------------------|-----------------------|-----------------------|-----------------------|
| 07 | The instructor is well prepared.                                                 | <input type="radio"/> | <input type="radio"/> | <input type="radio"/> | <input type="radio"/> | <input type="radio"/> | <input type="radio"/> |
| 08 | The instructor is motivated to teach the course.                                 | <input type="radio"/> | <input type="radio"/> | <input type="radio"/> | <input type="radio"/> | <input type="radio"/> | <input type="radio"/> |
| 09 | The instructor speaks encouragingly and audibly.                                 | <input type="radio"/> | <input type="radio"/> | <input type="radio"/> | <input type="radio"/> | <input type="radio"/> | <input type="radio"/> |
| 10 | The instructor makes meaningful use of aids (e.g., slides, presentations, etc.). | <input type="radio"/> | <input type="radio"/> | <input type="radio"/> | <input type="radio"/> | <input type="radio"/> | <input type="radio"/> |
| 11 | The instructor makes the course interesting.                                     | <input type="radio"/> | <input type="radio"/> | <input type="radio"/> | <input type="radio"/> | <input type="radio"/> | <input type="radio"/> |
| 12 | The course drags on tediously.                                                   | <input type="radio"/> | <input type="radio"/> | <input type="radio"/> | <input type="radio"/> | <input type="radio"/> | <input type="radio"/> |
| 13 | The instructor can make complicated material understandable.                     | <input type="radio"/> | <input type="radio"/> | <input type="radio"/> | <input type="radio"/> | <input type="radio"/> | <input type="radio"/> |
| 14 | The instructor uses examples to make the course material clear.                  | <input type="radio"/> | <input type="radio"/> | <input type="radio"/> | <input type="radio"/> | <input type="radio"/> | <input type="radio"/> |
| 15 | The instructor encourages critical discussion of the topics covered.             | <input type="radio"/> | <input type="radio"/> | <input type="radio"/> | <input type="radio"/> | <input type="radio"/> | <input type="radio"/> |
| 17 | The expectations are too high.                                                   | <input type="radio"/> | <input type="radio"/> | <input type="radio"/> | <input type="radio"/> | <input type="radio"/> | <input type="radio"/> |
| 18 | The expectations are too low.                                                    | <input type="radio"/> | <input type="radio"/> | <input type="radio"/> | <input type="radio"/> | <input type="radio"/> | <input type="radio"/> |

**Interaction/communication during the course and:**

|    |                                                      |                       |                       |                       |                       |                       |                       |
|----|------------------------------------------------------|-----------------------|-----------------------|-----------------------|-----------------------|-----------------------|-----------------------|
| 19 | I am motivated to actively think in this course.     | <input type="radio"/> | <input type="radio"/> | <input type="radio"/> | <input type="radio"/> | <input type="radio"/> | <input type="radio"/> |
| 20 | There is an open atmosphere for class participation. | <input type="radio"/> | <input type="radio"/> | <input type="radio"/> | <input type="radio"/> | <input type="radio"/> | <input type="radio"/> |
| 21 | A sufficient amount of discussion takes place.       | <input type="radio"/> | <input type="radio"/> | <input type="radio"/> | <input type="radio"/> | <input type="radio"/> | <input type="radio"/> |
| 22 | The student discussions are productive.              | <input type="radio"/> | <input type="radio"/> | <input type="radio"/> | <input type="radio"/> | <input type="radio"/> | <input type="radio"/> |

**Your own participation in the course:**

|    |                                                                                                                                                   | Disagree completely   |                       |                       |                       |                       | Agree completely      |
|----|---------------------------------------------------------------------------------------------------------------------------------------------------|-----------------------|-----------------------|-----------------------|-----------------------|-----------------------|-----------------------|
| 23 | I find the topic of the course interesting.                                                                                                       | <input type="radio"/> | <input type="radio"/> | <input type="radio"/> | <input type="radio"/> | <input type="radio"/> | <input type="radio"/> |
| 24 | I participate in the course verbally.                                                                                                             | <input type="radio"/> | <input type="radio"/> | <input type="radio"/> | <input type="radio"/> | <input type="radio"/> | <input type="radio"/> |
| 25 | I prepare myself for the course beforehand or go over the material again afterward (e.g., by reading the literature or discussing it with peers). | <input type="radio"/> | <input type="radio"/> | <input type="radio"/> | <input type="radio"/> | <input type="radio"/> | <input type="radio"/> |
| 26 | My workload for the course is high compared to other courses                                                                                      | <input type="radio"/> | <input type="radio"/> | <input type="radio"/> | <input type="radio"/> | <input type="radio"/> | <input type="radio"/> |

**Overall evaluation:**

|    |                                                                                  |                       |                       |                       |                       |                       |                       |
|----|----------------------------------------------------------------------------------|-----------------------|-----------------------|-----------------------|-----------------------|-----------------------|-----------------------|
| 27 | I am learning something meaningful and important in this course.                 | <input type="radio"/> | <input type="radio"/> | <input type="radio"/> | <input type="radio"/> | <input type="radio"/> | <input type="radio"/> |
| 28 | My relationship to this subject has developed further as a result of the course. | <input type="radio"/> | <input type="radio"/> | <input type="radio"/> | <input type="radio"/> | <input type="radio"/> | <input type="radio"/> |
| 29 | I would recommend this course to others.                                         | <input type="radio"/> | <input type="radio"/> | <input type="radio"/> | <input type="radio"/> | <input type="radio"/> | <input type="radio"/> |
| 30 | I would recommend the instructor to others.                                      | <input type="radio"/> | <input type="radio"/> | <input type="radio"/> | <input type="radio"/> | <input type="radio"/> | <input type="radio"/> |
| 31 | Taking this course is worthwhile.                                                | <input type="radio"/> | <input type="radio"/> | <input type="radio"/> | <input type="radio"/> | <input type="radio"/> | <input type="radio"/> |

**Comments:**

If you still have any comments about the course which you have not been able to share yet, then please use the following table to do so.

| Positive aspects | Negative aspects |
|------------------|------------------|
|                  |                  |
|                  |                  |
|                  |                  |
|                  |                  |
|                  |                  |

**You have reached the end. Thank you for your cooperation!**
